# Supplementary material
Source: PubMed Central journal article supplement (PMC8769106)

# Serial Thromboelastography and the Development of Venous Thromboembolism in Critically Ill Patients with COVID-19

## Supplementary Appendix

### Contents

#### SUPPLEMENTAL TABLES

|                                                                                 |   |
|---------------------------------------------------------------------------------|---|
| Table S1: Enrollment Coagulation Parameters Grouped by Bleeding Events.....     | 2 |
| Table S2: Enrollment Coagulation Parameters for the Additional 58 patients..... | 3 |
| Table S3: Results of Sensitivity Analyses.....                                  | 4 |

#### SUPPLEMENTAL FIGURES

|                                                                                                                                                       |    |
|-------------------------------------------------------------------------------------------------------------------------------------------------------|----|
| Figure S1: Predicted Relative Subhazard for Maximum Amplitude.....                                                                                    | 5  |
| Figure S2: Multivariable scatter plot showing the relationship between enrollment fibrinogen, platelet count, and thromboelastography parameters..... | 6  |
| Figure S3: Predicted Relative Subhazard for Fibrinogen.....                                                                                           | 7  |
| Figure S4: Predicted Relative Subhazard for Platelet Counts.....                                                                                      | 8  |
| Figure S5: Trend of Platelet Counts and Fibrinogen Stratified by VTE Status.....                                                                      | 9  |
| Figure S6: Scatter Plot of Immature Platelet Fraction and Platelet Counts.....                                                                        | 10 |

## SUPPLEMENTAL TABLES

**Supplemental Table S1: Enrollment Coagulation Parameters Grouped by Bleeding Events**

| Laboratory Measures                                 | Reference Range | All Patients<br>n=98 | Bleeding<br>n=11    | No Bleeding<br>n=87 | P-value |
|-----------------------------------------------------|-----------------|----------------------|---------------------|---------------------|---------|
| Fibrinogen (mg/dL) [N=96]                           | 188-450         | 678 (574.5 - 843.5)  | 649 (594 - 863)     | 680 (568 - 836)     | 0.93    |
| Platelet count ( $\times 10^3/\mu\text{L}$ ) [N=97] | 135 - 371       | 242 (169 - 300)      | 232 (130 - 271)     | 255 (169 - 304)     | 0.21    |
| INR [N=96]                                          |                 | 1.2 (1.1 - 1.3)      | 1.2 (1.1 - 1.2)     | 1.2 (1.1 - 1.3)     | 0.79    |
| PT (seconds) [N=96]                                 | 11.9 - 14.5     | 14.6 (14.0 - 15.7)   | 14.6 (14 - 15.4)    | 14.6 (13.9 - 15.7)  | 0.92    |
| aPTT (seconds) [N=94]                               | 23.5 - 33.5     | 31.1 (28.2 - 35.3)   | 33.7 (31.1 - 39.7)  | 30.4 (28.1 - 35)    | 0.14    |
| D-dimer (mcg/mL FEU)                                | 0.27 - 0.49     | 2.16 (0.96 - 6.81)   | 1.48 (1.39 - 13.43) | 2.20 (0.87 - 6.68)  | 0.64    |
| DIC Score (ISTH)                                    |                 | 2 (2 - 3)            | 2.5 (2 - 4)         | 2 (1 - 3)           | 0.28    |
| Thromboelastography [N=95]                          |                 |                      |                     |                     |         |
| MA (mm)                                             | 50 - 70         | 67.0 (63.7 - 70.7)   | 63.8 (61.7 - 67.9)  | 67.2 (64.1 - 70.8)  | 0.18    |
| $\alpha$ (degrees)                                  | 53 - 72         | 73.2 (68.7 - 76.4)   | 67.9 (66.0 - 71.0)  | 73.8 (69.5 - 76.4)  | <0.01   |
| R (minutes)                                         | 5 - 10          | 3.7 (3.2 - 4.8)      | 4.9 (3.3 - 5.8)     | 3.6 (3.2 - 4.3)     | 0.06    |
| G (dyne/cm <sup>2</sup> )                           | 4.5-11          | 10.2 (8.8 - 12.1)    | 9.2 (8.1 - 10.6)    | 10.2 (8.9 - 12.1)   | 0.19    |
| Clotting Index                                      | -3.0 - +3.0     | 3.4 (2.9 - 3.9)      | 2.9 (2.3 - 3.5)     | 3.4 (2.9 - 4.0)     | 0.07    |
| Ly30 (%)                                            | 0 - 8           | 0.6 (0 - 1.4)        | 0.75 (0.1 - 2.5)    | 0.6 (0 - 1.4)       | 0.50    |

$\alpha$  = alpha angle, aPTT = activated partial thromboplastin time, Bleeding = Major bleeding defined by ISTH guidelines. DIC = disseminated intravascular coagulation, dL = deciliter, G = shear elastic modulus (complete clot strength), INR = international normalized ratio, IQR = interquartile range, ISTH = International Society on Thrombosis and Haemostasis, Ly30 = percent lysis at 30 minutes, MA = maximum amplitude, mg = milligram, PT = prothrombin time, R = reaction time.

P-values from two-sided Mann-Whitney U test for continuous variables.

**Supplemental Table S2: Enrollment Coagulation Parameters for the Additional 58 patients  
Excluding the previously reported 40 patients**

| Laboratory Measures<br>Median (IQR)                 | Reference<br>Range | All Patients       | VTE<br>n=14        | No VTE<br>n=44     | P-value |
|-----------------------------------------------------|--------------------|--------------------|--------------------|--------------------|---------|
| Fibrinogen (mg/dL) [N=56]                           | 188-450            | 673.5 (578 - 797)  | 546 (365 - 626)    | 688 (631 - 828)    | <0.001  |
| Platelet count ( $\times 10^3/\mu\text{L}$ ) [N=57] | 135 - 371          | 324 (164 - 287)    | 162.5 (117 - 259)  | 253 (196 - 301)    | 0.02    |
| INR [N=57]                                          |                    | 1.2 (1.1 - 1.3)    | 1.2 (1.0 - 1.3)    | 1.2 (1.1 - 1.3)    | 0.62    |
| PT (seconds) [N=57]                                 | 11.9 - 14.5        | 14.9 (14.1 - 15.8) | 15.3 (13.3 - 16.3) | 14.8 (14.1 - 15.8) | 0.75    |
| aPTT (seconds) [N=57]                               | 23.5 - 33.5        | 30 (27.8 - 35.3)   | 29.9 (27.4 - 31)   | 32.2 (27.8 - 36.2) | 0.35    |
| D-dimer (mcg/mL FEU)                                | 0.27 - 0.49        | 2.08 (0.84 - 5.51) | 20 (6.81 - 20)     | 1.62 (0.78 - 3.32) | <0.001  |
| DIC Score (ISTH)                                    |                    | 2 (0 - 3)          | 3 (3 - 3)          | 2 (0 - 3)          | 0.01    |
| Thromboelastography [N=55]                          |                    |                    |                    |                    |         |
| MA (mm)                                             | 50 - 70            | 66.7 (63.7 - 68.4) | 60.3 (53.7 - 65.2) | 67.3 (65.2 - 69.8) | <0.001  |
| $\alpha$ (degrees)                                  | 53 - 72            | 73.8 (68.6 - 76.4) | 67.0 (60.2 - 73.7) | 75.3 (69.9 - 76.6) | <0.001  |
| R (minutes)                                         | 5 - 10             | 3.7 (3.1 - 4.4)    | 3.4 (2.8 - 3.8)    | 4.1 (3.2 - 4.8)    | 0.08    |
| G (dyne/cm <sup>2</sup> ) <sup>d</sup>              | 4.5-11             | 10 (8.8 - 11.4)    | 7.6 (5.8 - 9.4)    | 10.3 (9.4 - 11.6)  | <0.001  |
| Clotting Index                                      | -3.0 - +3.0        | 3.4 (2.6 - 3.8)    | 2.6 (1.5 - 3.4)    | 3.5 (3.0 - 3.8)    | 0.002   |
| Ly30 (%)                                            | 0 - 8              | 0.5 (0 - 1.6)      | 1.0 (0.1 - 1.6)    | 0.4 (0 - 1.1)      | 0.37    |

$\alpha$  = alpha angle, aPTT = activated partial thromboplastin time, DIC = disseminated intravascular coagulation, dL = deciliter, G = shear elastic modulus (complete clot strength), INR = international normalized ratio, IQR = interquartile range, ISTH = International Society on Thrombosis and Haemostasis, Ly30 = percent lysis at 30 minutes, MA = maximum amplitude, mg = milligram, PT = prothrombin time, R = reaction time, VTE = venous thromboembolism.

P-values from two-sided Mann-Whitney U test for continuous variables.

**Supplemental Table S3: Sensitivity Analyses**

|                                                                                   | n  | SHR  | 95% Confidence Interval | p-value |
|-----------------------------------------------------------------------------------|----|------|-------------------------|---------|
| Sensitivity Analysis (1)                                                          |    |      |                         |         |
| Enrollment                                                                        | 70 | 0.91 | 0.86 - 0.97             | 0.003   |
| Peak                                                                              | 85 | 0.92 | 0.89 - 0.95             | <0.001  |
| Sensitivity Analysis (2)                                                          |    |      |                         |         |
| Enrollment                                                                        | 80 | 0.93 | 0.88 - 0.98             | 0.007   |
| Peak                                                                              | 83 | 0.85 | 0.79 - 0.91             | <0.001  |
| Sensitivity Analysis (3)                                                          |    |      |                         |         |
| Enrollment                                                                        | 69 | 0.92 | 0.87 - 0.98             | 0.008   |
| Peak                                                                              | 71 | 0.85 | 0.80 - 0.91             | <0.001  |
| Adjusting for age, sex, SOFA score, antiplatelet exposure, and anticoagulant dose |    |      |                         |         |
| Enrollment                                                                        | 95 | 0.92 | 0.87 - 0.98             | 0.005   |
| Peak                                                                              | 98 | 0.84 | 0.78 - 0.91             | <0.001  |

n = number of patients, SHR = subdistribution hazard ratio, SOFA = sequential organ failure assessment

## SUPPLEMENTAL FIGURES

### Supplemental Figure S1: Predicted Relative Subhazard for Maximum Amplitude

Left panel: Predicted relative subhazard for the risk of venous thromboembolism compared to the median enrollment thromboelastography maximum amplitude (TEG MA). Right panel: Zoomed in image including 97% of enrollment measures. The dotted line at a predicted subhazard ratio of 1 represents the reference line and intersects with the curve at the median enrollment TEG MA.

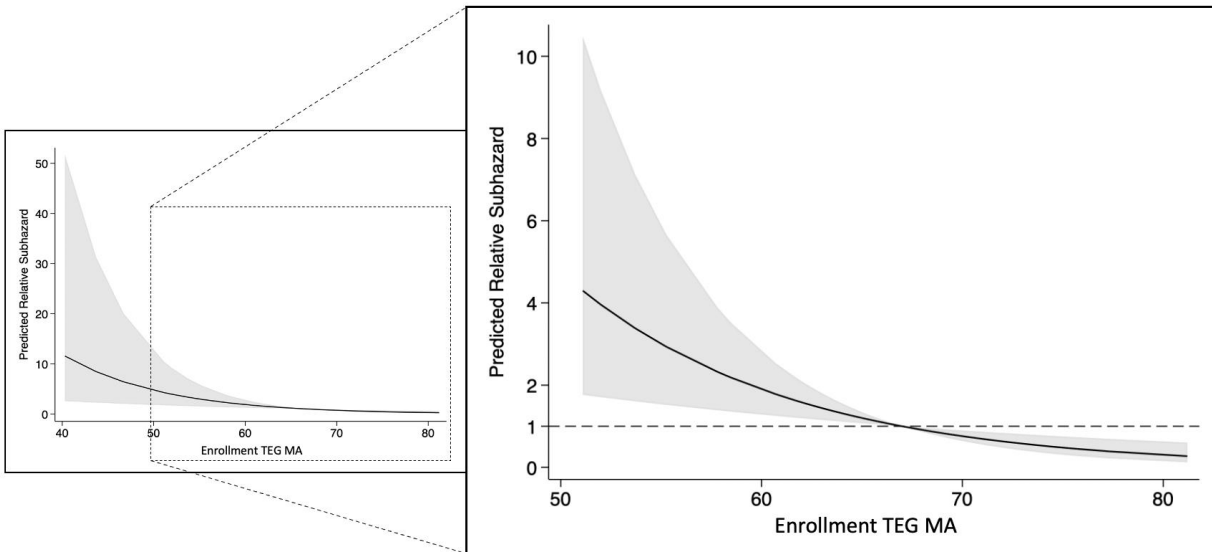

**Supplemental Figure S2:** Multivariable scatter plot showing the relationship between enrollment fibrinogen, platelet count, and thromboelastography parameters.

Panel A: MA: maximum amplitude (mm), Panel B:  $\alpha$ : alpha angle (degrees), Panel C: G: shear elastic modulus (dynes/cm<sup>2</sup>), and Panel D: clotting index. Patients who developed venous thromboembolism (VTE) during the index hospitalization are represented by larger circles. The color of circles represents thromboelastography measurement results as shown on the panels to the right of each plot.

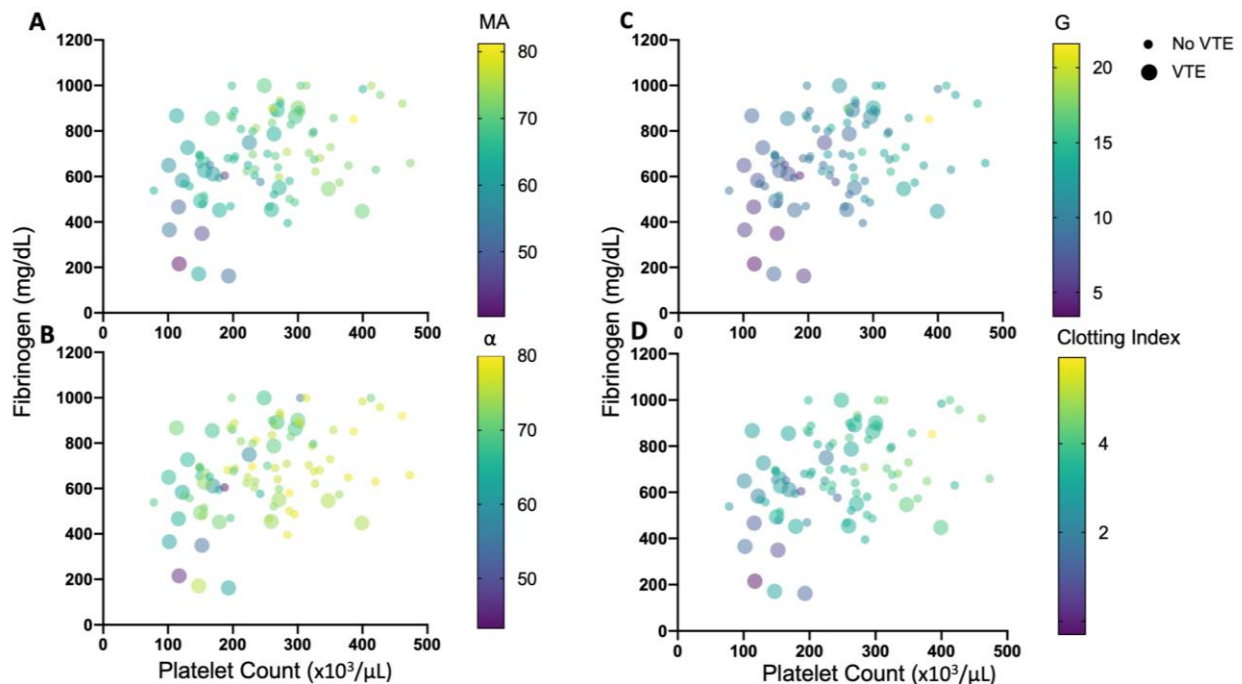

Panel A demonstrates that low platelet count (toward the left on the x axis) was associated with low fibrinogen level (toward the bottom side of y axis), and that both low platelet count and low fibrinogen were associated with low MA (darker color of circles). Patients who developed VTE (large circles) tended to cluster to the bottom left of the plot and have a darker color, indicating that patients who developed VTE tended to have lower platelet count, lower fibrinogen, and lower MA

**Supplemental Figure S3: Predicted Relative Subhazard for Fibrinogen**

Predicted relative subhazard for the risk of venous thromboembolism compared to the median baseline platelet count. The dotted line at a subhazard ratio of 1 represents the reference line.

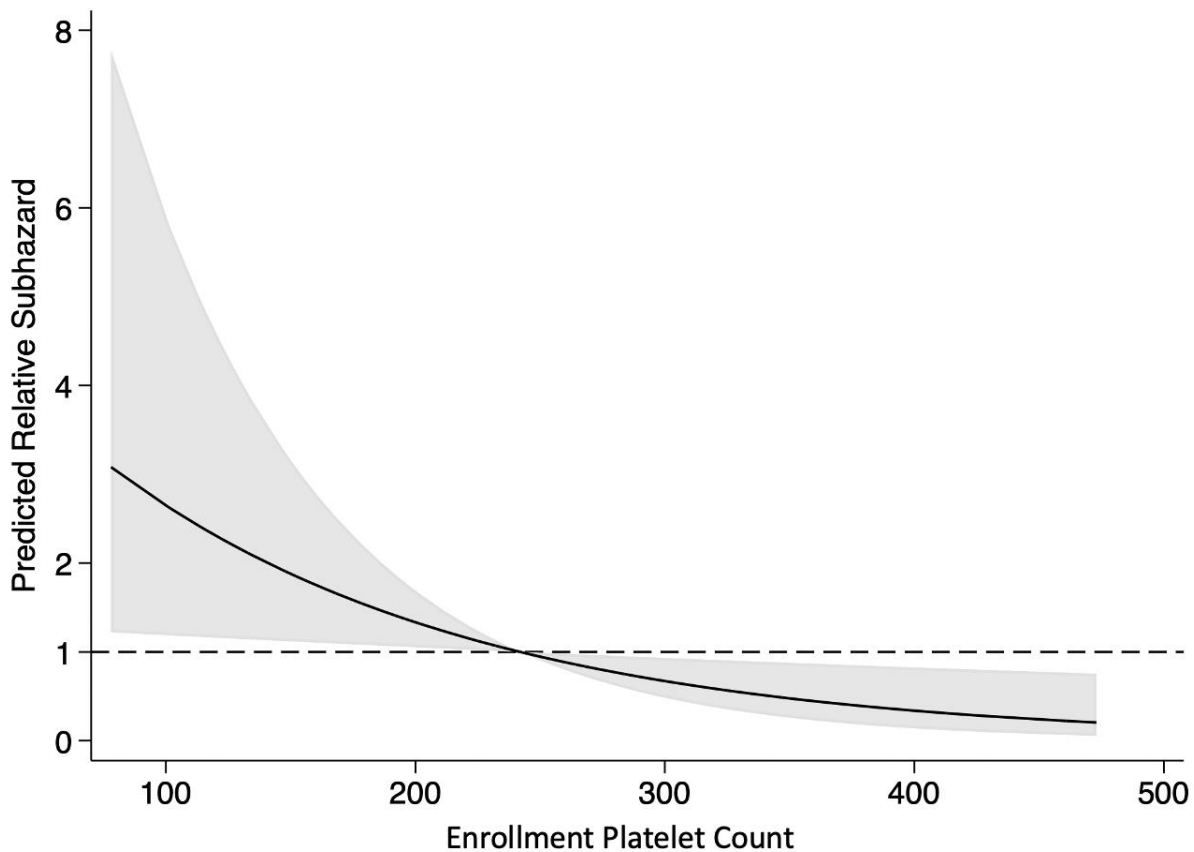

**Supplemental Figure S4: Predicted Relative Subhazard for Platelet Counts**

Left: Predicted relative subhazard for the risk of venous thromboembolism compared to the median intensive care unit (ICU) admission fibrinogen level. Right: Zoomed in image including 96% of ICU admission measures. The dotted line at a predicted subhazard ratio of 1 represents the reference line and intersects with the curve at the median ICU admission fibrinogen level.

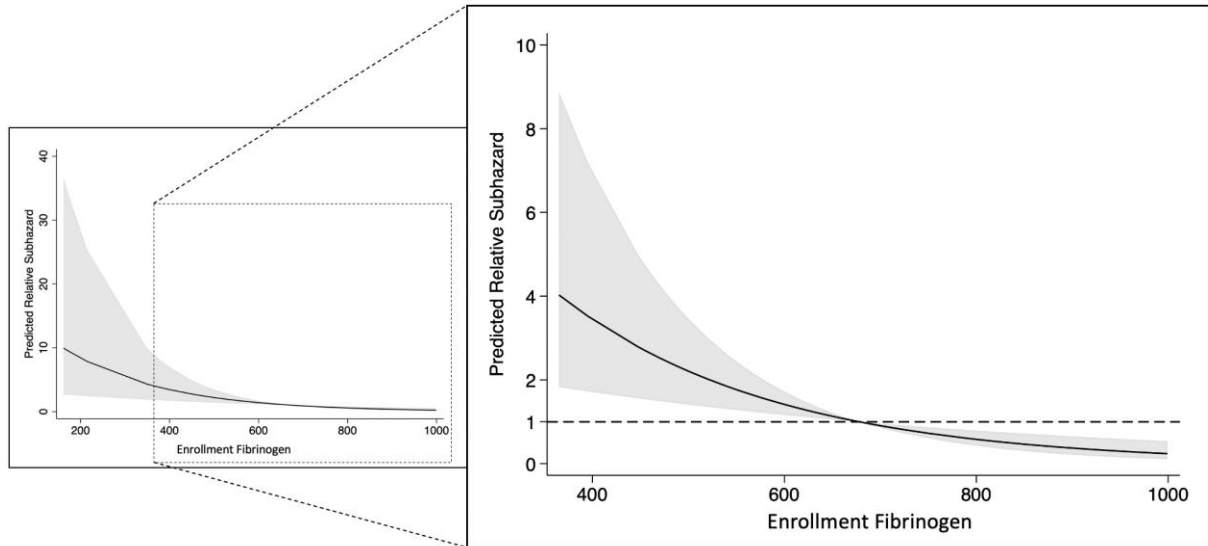



**Supplemental Figure S5:** Trend of Platelet Counts and Fibrinogen Stratified by Venous Thromboembolism Status

Dot plot of platelet counts and fibrinogen levels on days 0, 3, 5, and 7 of enrollment grouped by patients who did not develop a venous thromboembolism (blue circles) and those who did develop a venous thromboembolism (red diamond) during the index hospitalization. Each dot represents a single measurement. The median (bolded center line) and interquartile range (brackets) are also denoted for measurements at each time point.

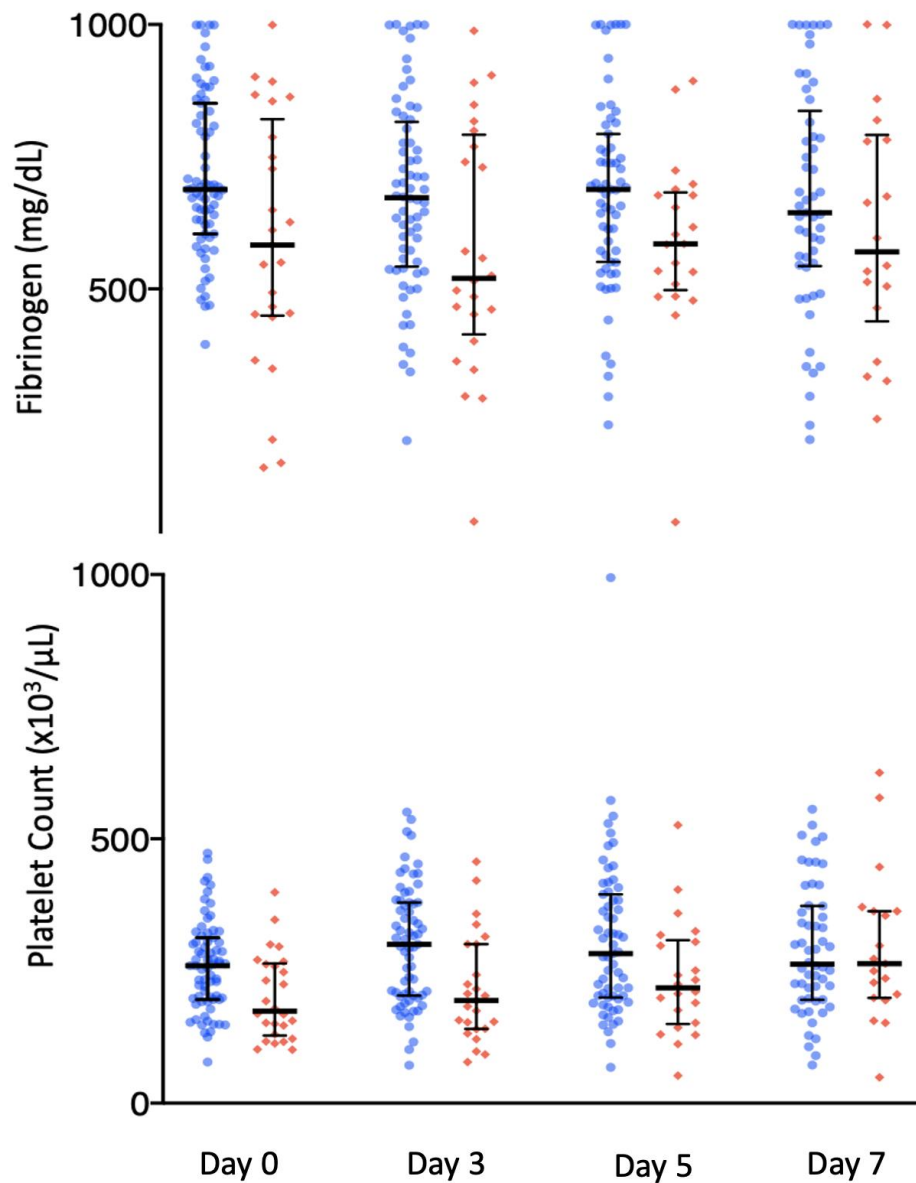

**Supplemental Figure S6: Scatter Plot of Immature Platelet Fraction and Platelet Counts**

Scatter plot of the immature platelet fraction (IPF) compared to the platelet count. As the platelet count declines even within the normal range, the IPF increases consistent with intact platelet production in the setting of a consumptive process.

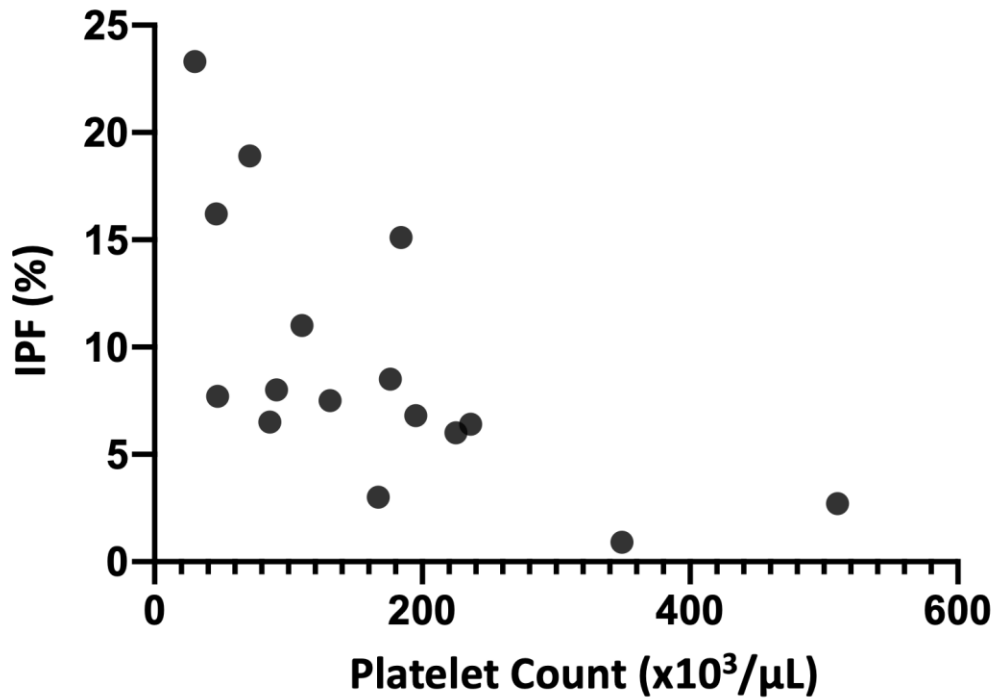

Supplement: cc9-4-e0618-s001.pdf [file cc9-4-e0618-s001.pdf]
